# Supplementary material
Source: Royal Society of Chemistry journal article supplement (doi:10.1039/d6tb00418k)
Supplement: d6tb00418k1.pdf [file d6tb00418k1.pdf]

# 1 Supplementary Materials

2

## Supplementary Fig.1

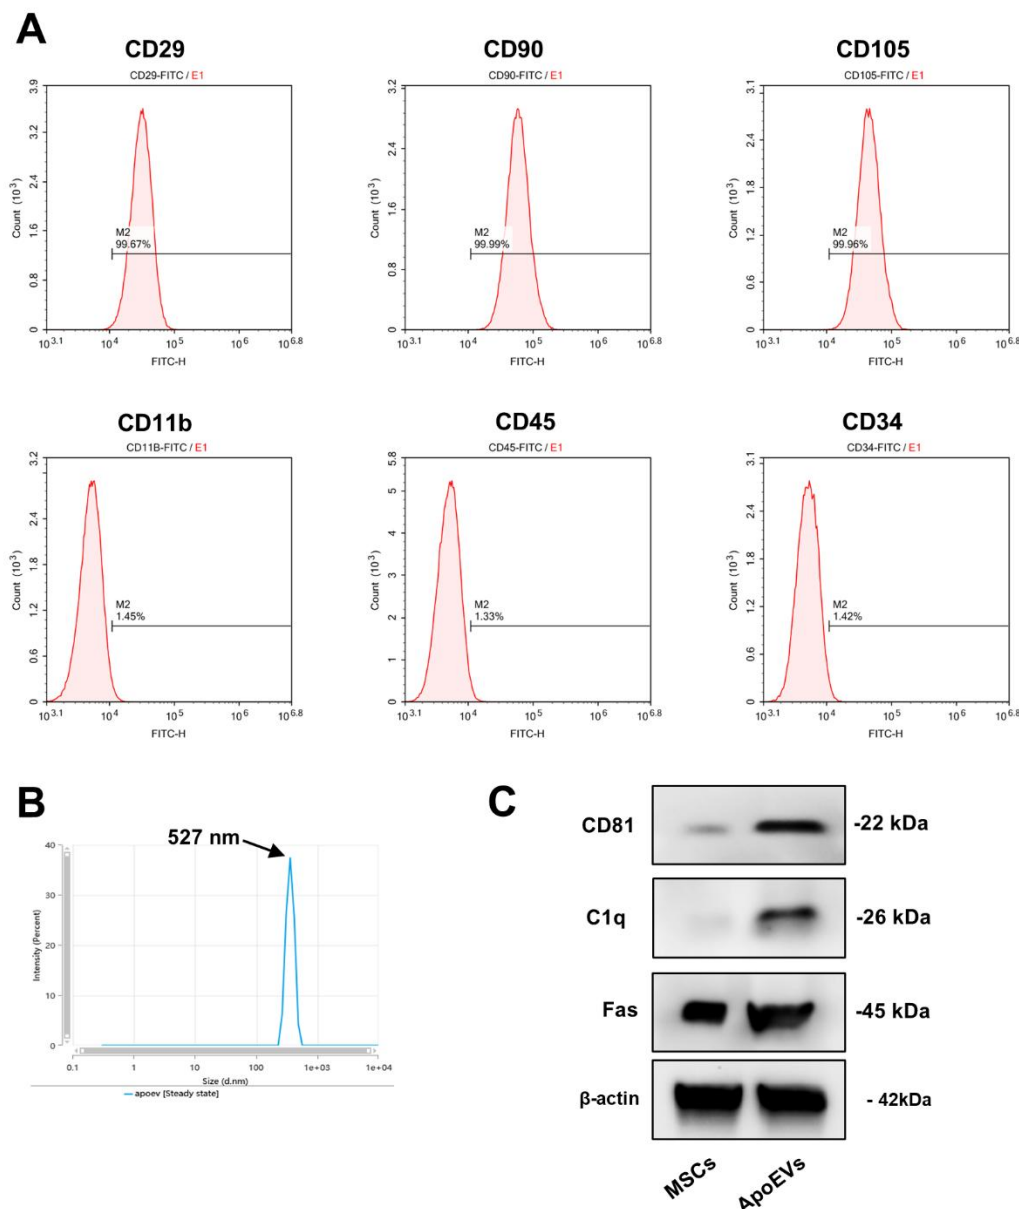

3

4 **Supplementary Figure 1. Identification and characterization of mesenchymal stem cells**  
5 **(MSCs) from bone marrow and apoptotic extracellular vesicles (ApoEVs) from MSCs. (A)**  
6 Flow cytometric analysis of surface markers on MSCs. The cells showed positive expression for  
7 mesenchymal markers (CD29, CD90 and CD105) and negative expression for hematopoietic

8 markers (CD11b, CD34 and CD45), which confirm their stem cell identity. (B) Particle size  
9 distribution of ApoEVs determined by nanoparticle tracking analysis (NTA), which shows the  
10 representative peak diameter around 527 nm. (C) Western blot analysis of specific protein markers  
11 in MSCs and ApoEVs.

## Supplementary Fig.2

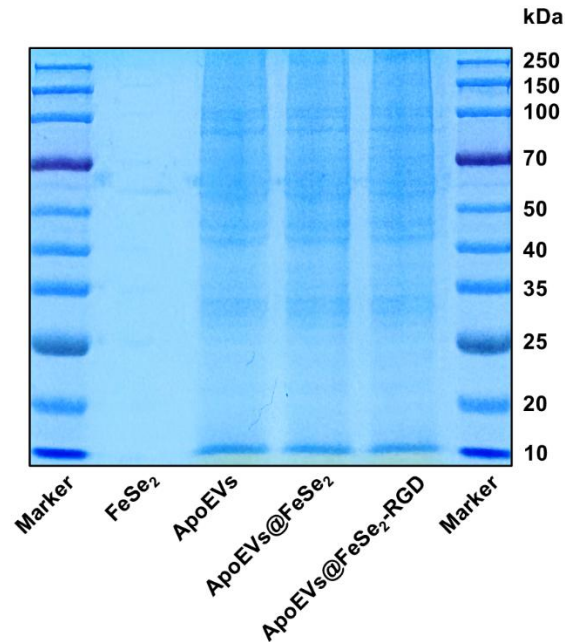

12  
13 **Supplementary Figure.2 SDS-PAGE analysis of ApoEVs membrane protein integrity after**  
14 **FeSe<sub>2</sub> decoration and RGD conjugation.** SDS-PAGE analysis showed no detectable protein  
15 bands for pristine FeSe<sub>2</sub>. ApoEVs exhibited multiple protein bands mainly between 20 and 100  
16 kDa. ApoEVs@FeSe<sub>2</sub> and ApoEVs@FeSe<sub>2</sub>-RGD displayed protein patterns comparable to native  
17 ApoEVs, indicating that vesicular membrane proteins were preserved during FeSe<sub>2</sub> decoration and  
18 RGD conjugation.

Supplementary Fig.3

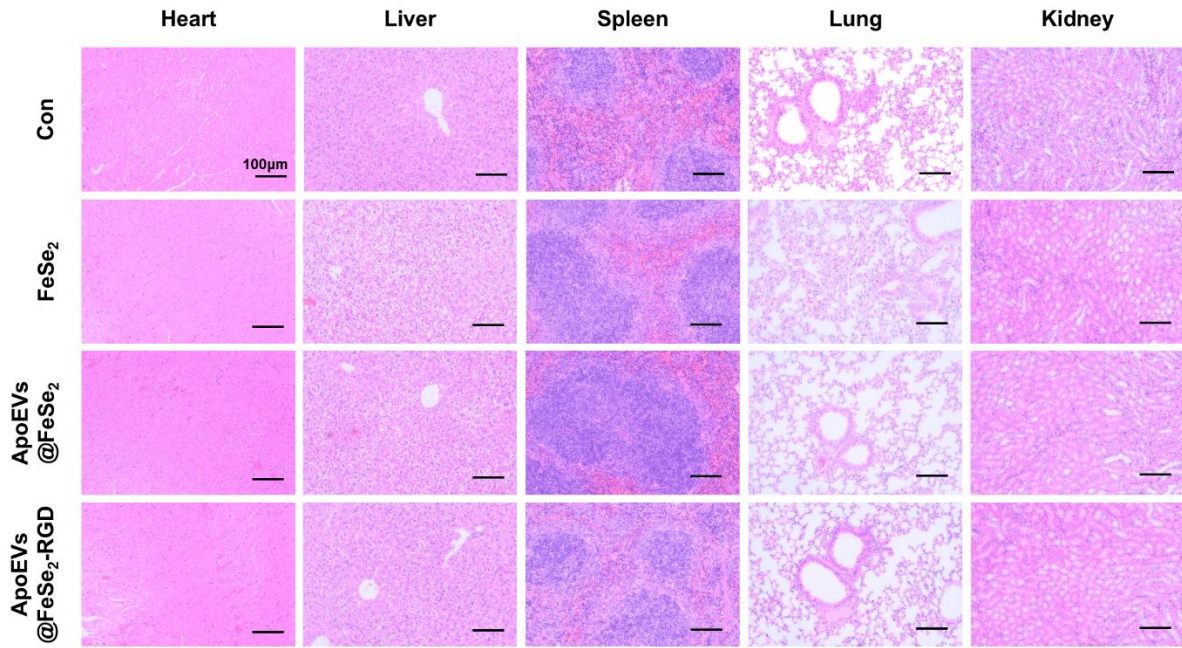

19  
20 **Supplementary Figure 3. Histopathological assessment of major organs for biosafety**  
21 **evaluation.** Representative hematoxylin and eosin (H&E) staining images of major organs (heart,  
22 liver, spleen, lung, and kidney) harvested from mice after treatment with PBS (Control), FeSe<sub>2</sub>,  
23 ApoEVs@FeSe<sub>2</sub> and ApoEVs@FeSe<sub>2</sub>-RGD. No significant inflammatory cell infiltration, tissue  
24 necrosis, or structural abnormalities were observed, indicating the good biocompatibility and low  
25 systemic toxicity of the platform. Scale bar = 100 µm.

**Supplementary Fig.4**

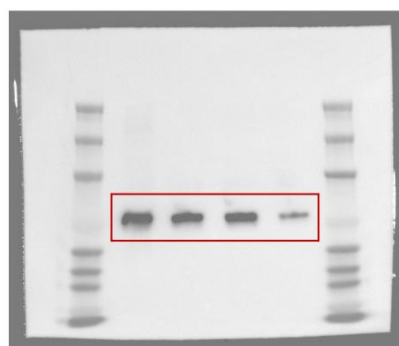

**NRF2 (90-100kDa)**

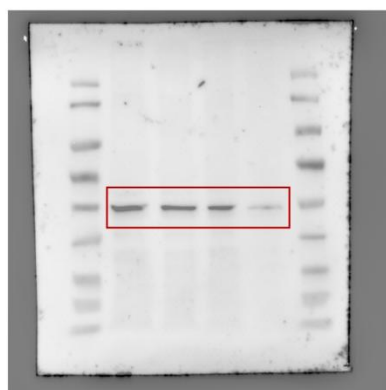

**NOX2 (65kDa)**

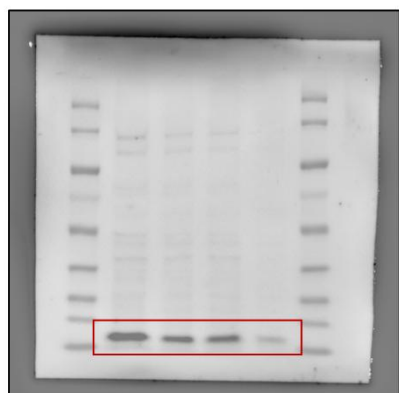

**SOD2 (22kDa)**

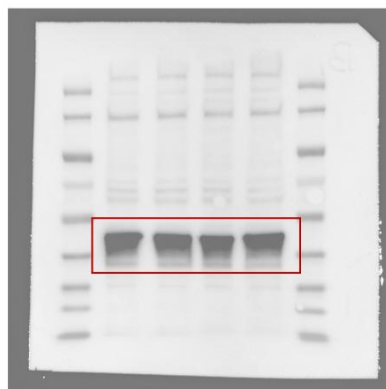

**$\beta$ -actin (42kDa)**

**Related to Fig.3**

26

27 **Supplementary Figure 4. Uncropped western blot membranes related to Figure 3.**

**Supplementary Fig.5**

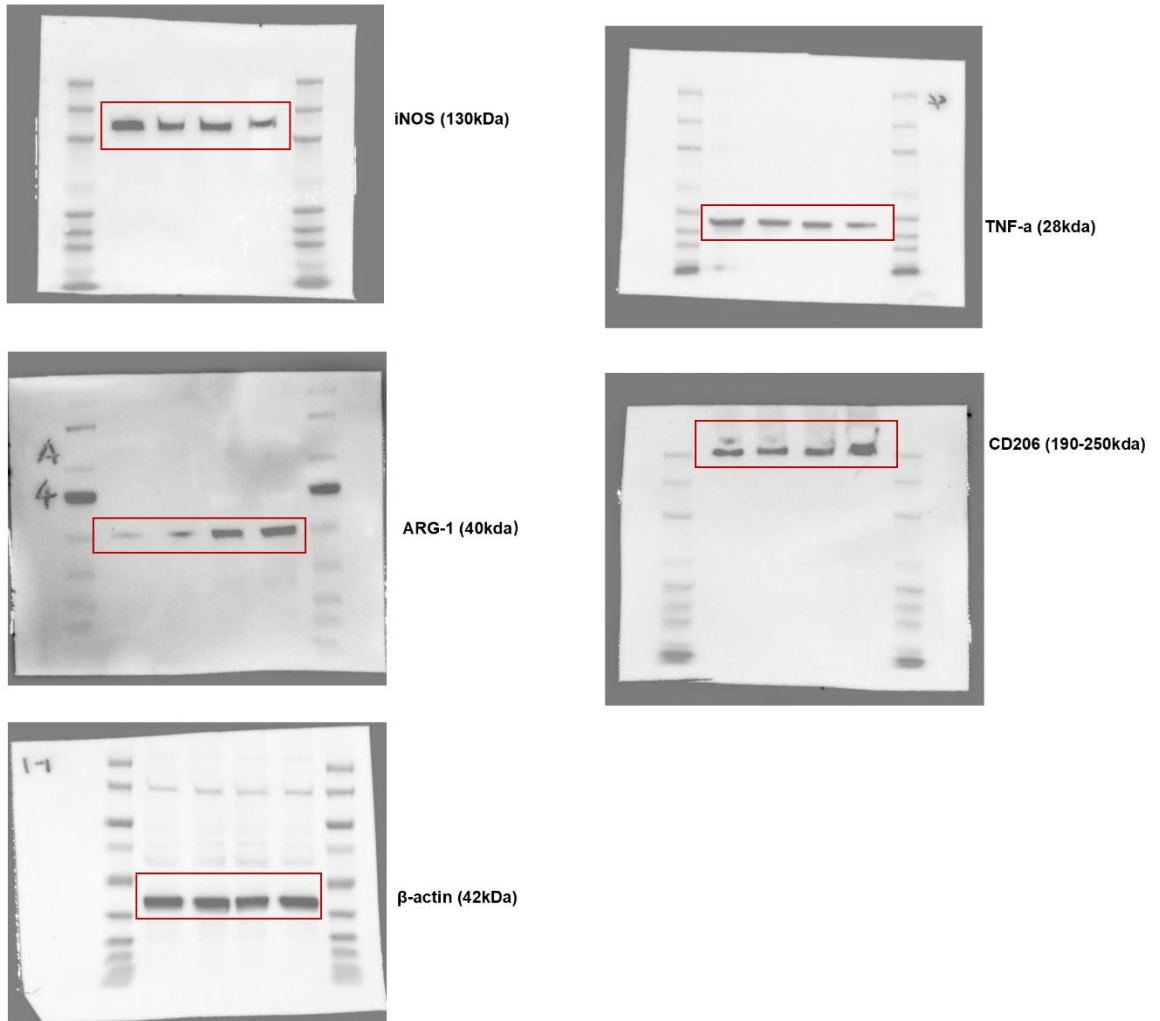

**Related to Fig.4**

28

29 **Supplementary Figure 5. Uncropped western blot membranes related to Figure 4.**

Supplementary Fig.6

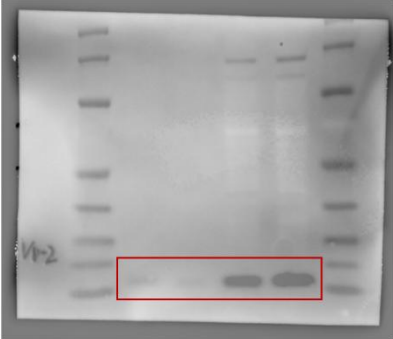

VEGF(23kDa)

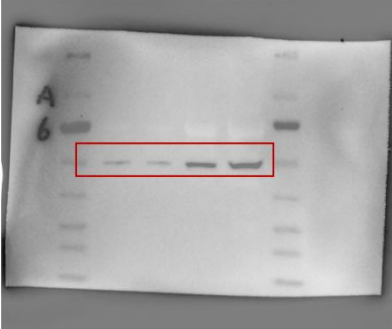

ANG II (57kda)

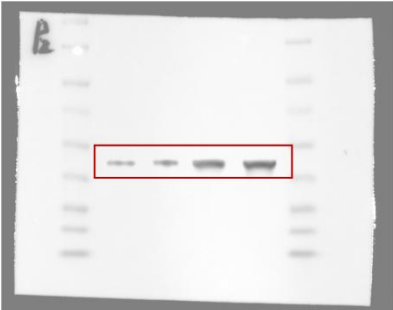

PDGF (43kda)

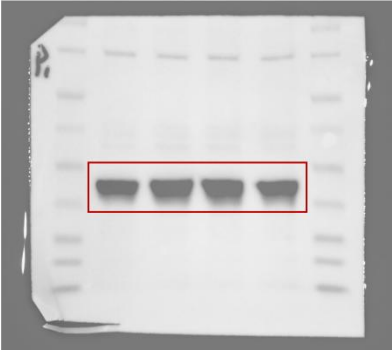

beta-actin (42kDa)

Related to Fig.5

30

31

Supplementary Figure 6. Uncropped western blot membranes related to Figure 5.

**Supplementary Fig.7**

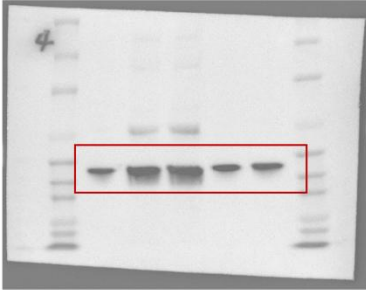

p-IκBα (39kDa)

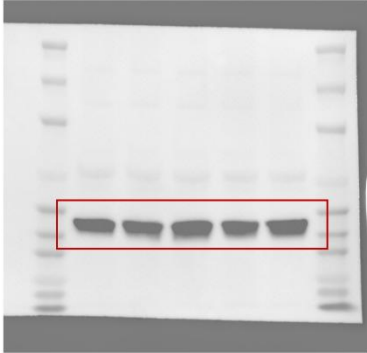

IκBα (39kDa)

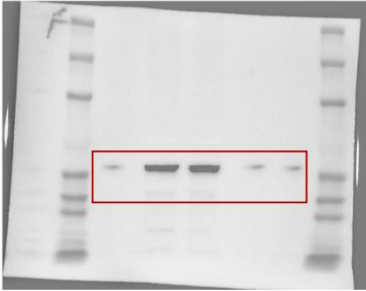

p-p65 (65kDa)

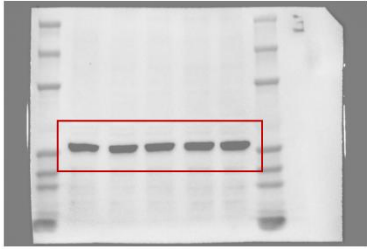

p65 (65kDa)

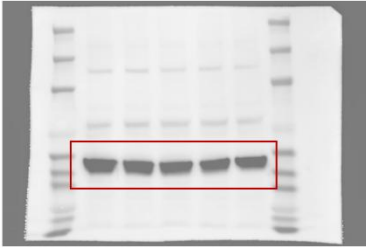

β-actin (42kDa)

**Related to Fig.6**

32  
33 **Supplementary Figure 7. Uncropped western blot membranes related to Figure 6.**

Supplementary Fig.8

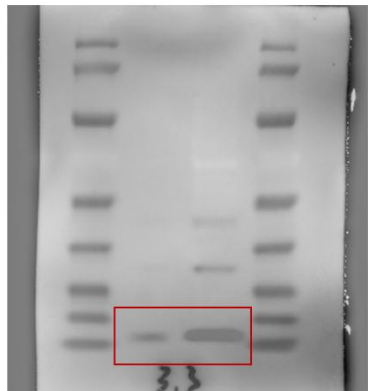

CD81 (22kDa)

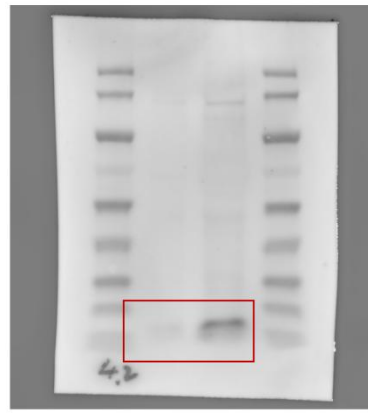

C1q (26kDa)

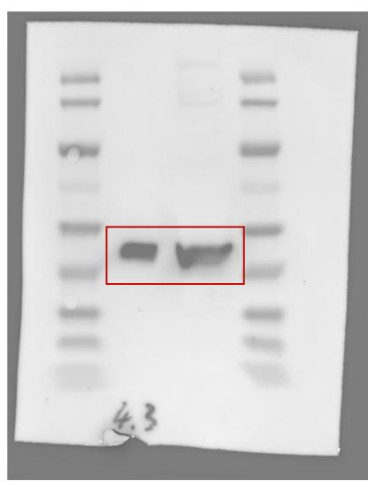

Fas (45kDa)

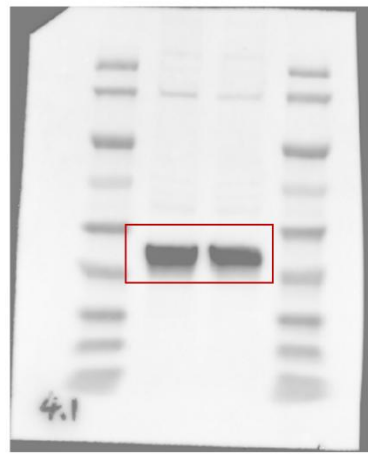

$\beta$ -actin (42kDa)

Related to Supplementary Fig.1

34

35

36

Supplementary Figure 8. Uncropped western blot membranes related to Supplementary Figure 1.
